# Supplementary material
Source: MDPI journal article supplement (https://www.mdpi.com/2673-4168/1/1/5)
Supplement: s1 [file s1]

Table S1

*Adverse Childhood Experiences Questionnaire Subscale Items*

|                                               |                                                                                                                               |
|-----------------------------------------------|-------------------------------------------------------------------------------------------------------------------------------|
| <i>ACEs-Abuse</i>                             |                                                                                                                               |
| 1)                                            | Did a parent or other adult in the household often swear at you, insult you, put you down, or humiliate you?                  |
| 2)                                            | Did a parent or other adult in the household often act in a way that made you afraid that you might be physically hurt?       |
| 3)                                            | Did a parent or other adult in the household often push, grab, slap, or throw something at you?                               |
| 4)                                            | Did a parent or other adult in the household ever hit you so hard that you had marks or were injured?                         |
| 5)                                            | Did an adult or person at least 5 years older than you ever touch or fondle you or have you touch their body in a sexual way? |
| 6)                                            | Did an adult or person at least 5 years older than you ever try to or actually have oral, anal, or vaginal sex with you?      |
| <i>ACEs-Neglect</i>                           |                                                                                                                               |
| 7)                                            | Did you often feel that no one in your family loved you or thought you were important or special?                             |
| 8)                                            | Did you often feel that your family didn't look out for each other, feel close to each other, or support each other?          |
| 9)                                            | Did you often feel that you didn't have enough to eat, had to wear dirty clothes, and had no one to protect you?              |
| 10)                                           | Did you often feel that your parents were too drunk or high to take care of you or take you to the doctor if you needed it?   |
| <i>ACEs-Household Dysfunction</i>             |                                                                                                                               |
| 11)                                           | Were your parents ever separated or divorced?                                                                                 |
| 12)                                           | Was your mother or stepmother often pushed, grabbed, slapped, or had something thrown at her?                                 |
| 13)                                           | Was your mother or stepmother sometimes or often kicked, bitten, hit with a fist, or hit with something hard?                 |
| 14)                                           | Was your mother or stepmother ever repeatedly hit over at least a few minutes or threatened with a gun or knife?              |
| 15)                                           | Did you live with anyone who was a problem drinker or alcoholic or who used street drugs?                                     |
| 16)                                           | Was a household member depressed or mentally ill or did a household member attempt suicide?                                   |
| 17)                                           | Did a household member ever go to prison?                                                                                     |
| <i>Note: ACE=adverse childhood experience</i> |                                                                                                                               |
